# Supplementary material for: B cell focused transient immune suppression protocol for efficient AAV readministration to the liver
Source: PubMed Central journal article supplement — Mol Ther Methods Clin Dev. 2024 Feb 20;32(1):101216. doi: 10.1016/j.omtm.2024.101216 (PMC10911854; doi:10.1016/j.omtm.2024.101216), 2024-02-20
Supplement: mmc1.pdf [file mmc1.pdf]

**OMTM, Volume 32**

**Supplemental information**

**B cell focused transient immune  
suppression protocol for efficient  
AAV readministration to the liver**

**Jyoti Rana, Roland W. Herzog, Maite Muñoz-Melero, Kentaro Yamada, Sandeep R.P. Kumar, Anh K. Lam, David M. Markusic, Dongsheng Duan, Cox Terhorst, Barry J. Byrne, Manuela Corti, and Moanaro Biswas**

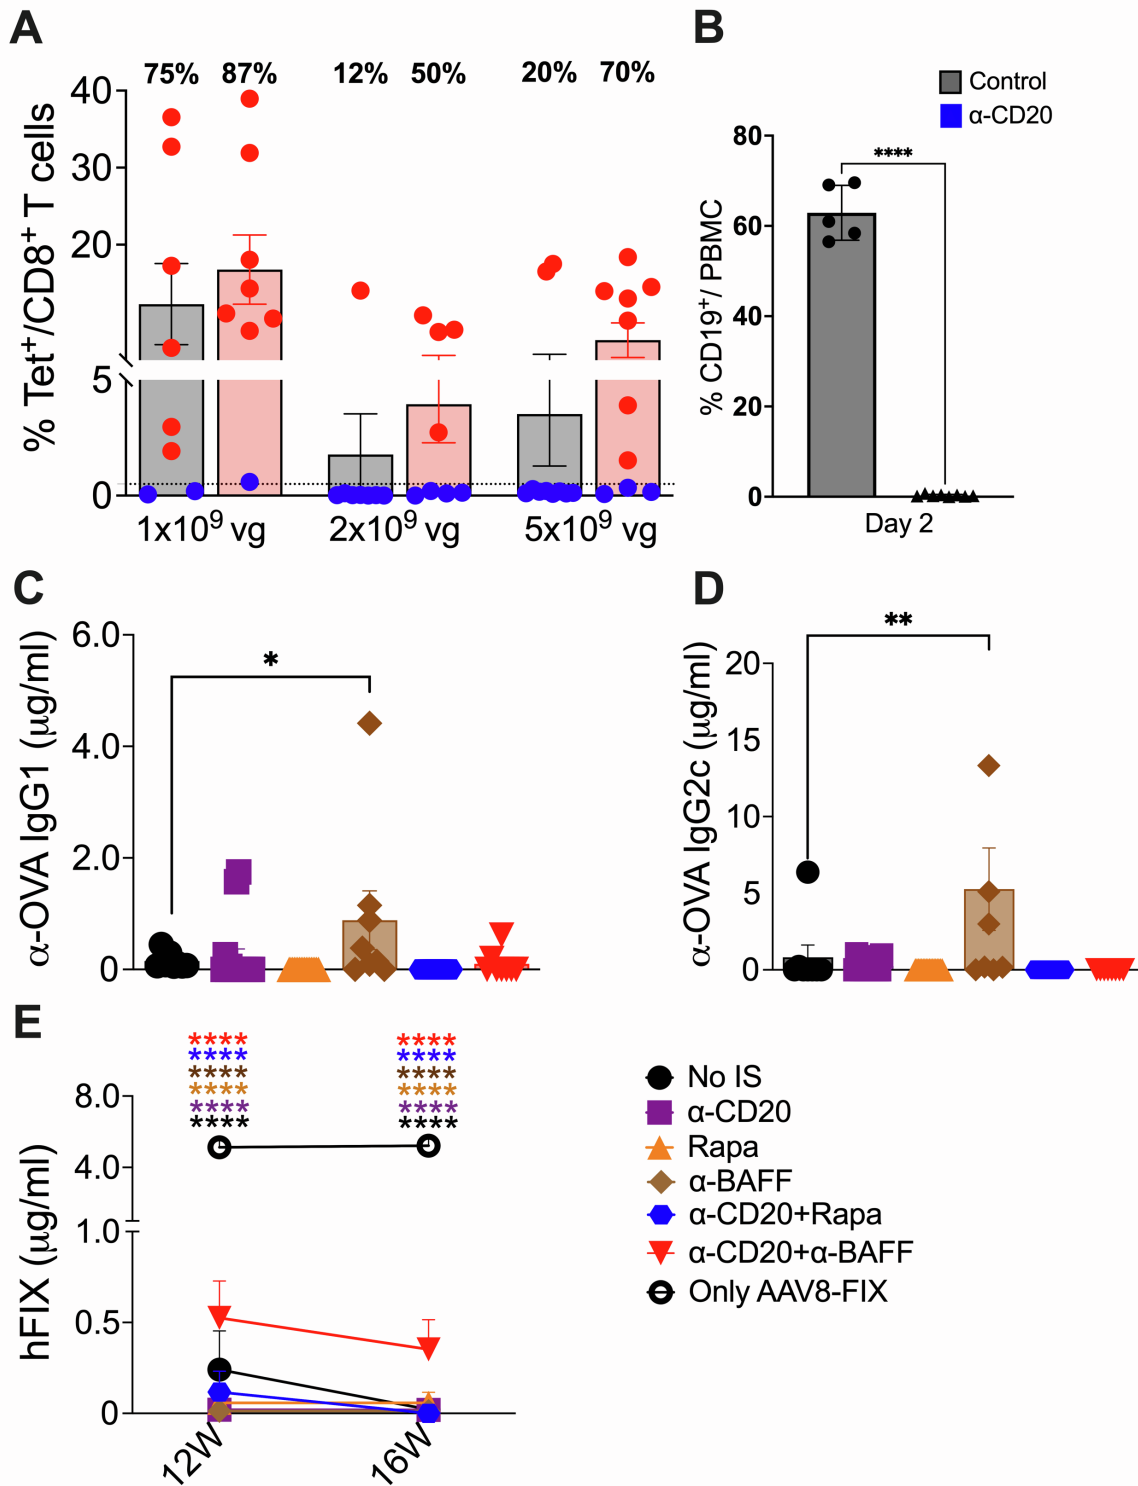

**Figure S1: Effect of concurrent immune suppressive (IS) treatment. A)** Comparison of CD8<sup>+</sup> T cell responses to AAV8-OVA administered at 1x10<sup>9</sup>, 2x10<sup>9</sup>, and 5x10<sup>9</sup> vg/animal for no IS vs concurrent  $\alpha$ -CD20 +  $\alpha$ -BAFF treatment (n=8/group). Red dots indicate tetramer<sup>+</sup> (Tet<sup>+</sup>) animals and blue dots indicate (Tet<sup>-</sup>) animals. Frequency of Tet<sup>+</sup> animals in each group is indicated above each bar. **B)** Frequency of circulating B cells on day 2 after initiation of  $\alpha$ -CD20 treatment. **C and D)** Comparison of OVA specific IgG1 and IgG2c levels from plasma samples collected at 4 weeks post AAV8-OVA and IS administration (n=5-8/group). **E)** Circulating hFIX levels at 12- and 16- weeks post initial dosing. Statistical significance was calculated by one-way ANOVA (Dunnett's multiple comparisons) for **B**, **C**, and **D**, two-way ANOVA for **E**. \*p  $\leq$  0.05; \*\*p  $\leq$  0.01; \*\*\*\*p  $\leq$  0.0001.

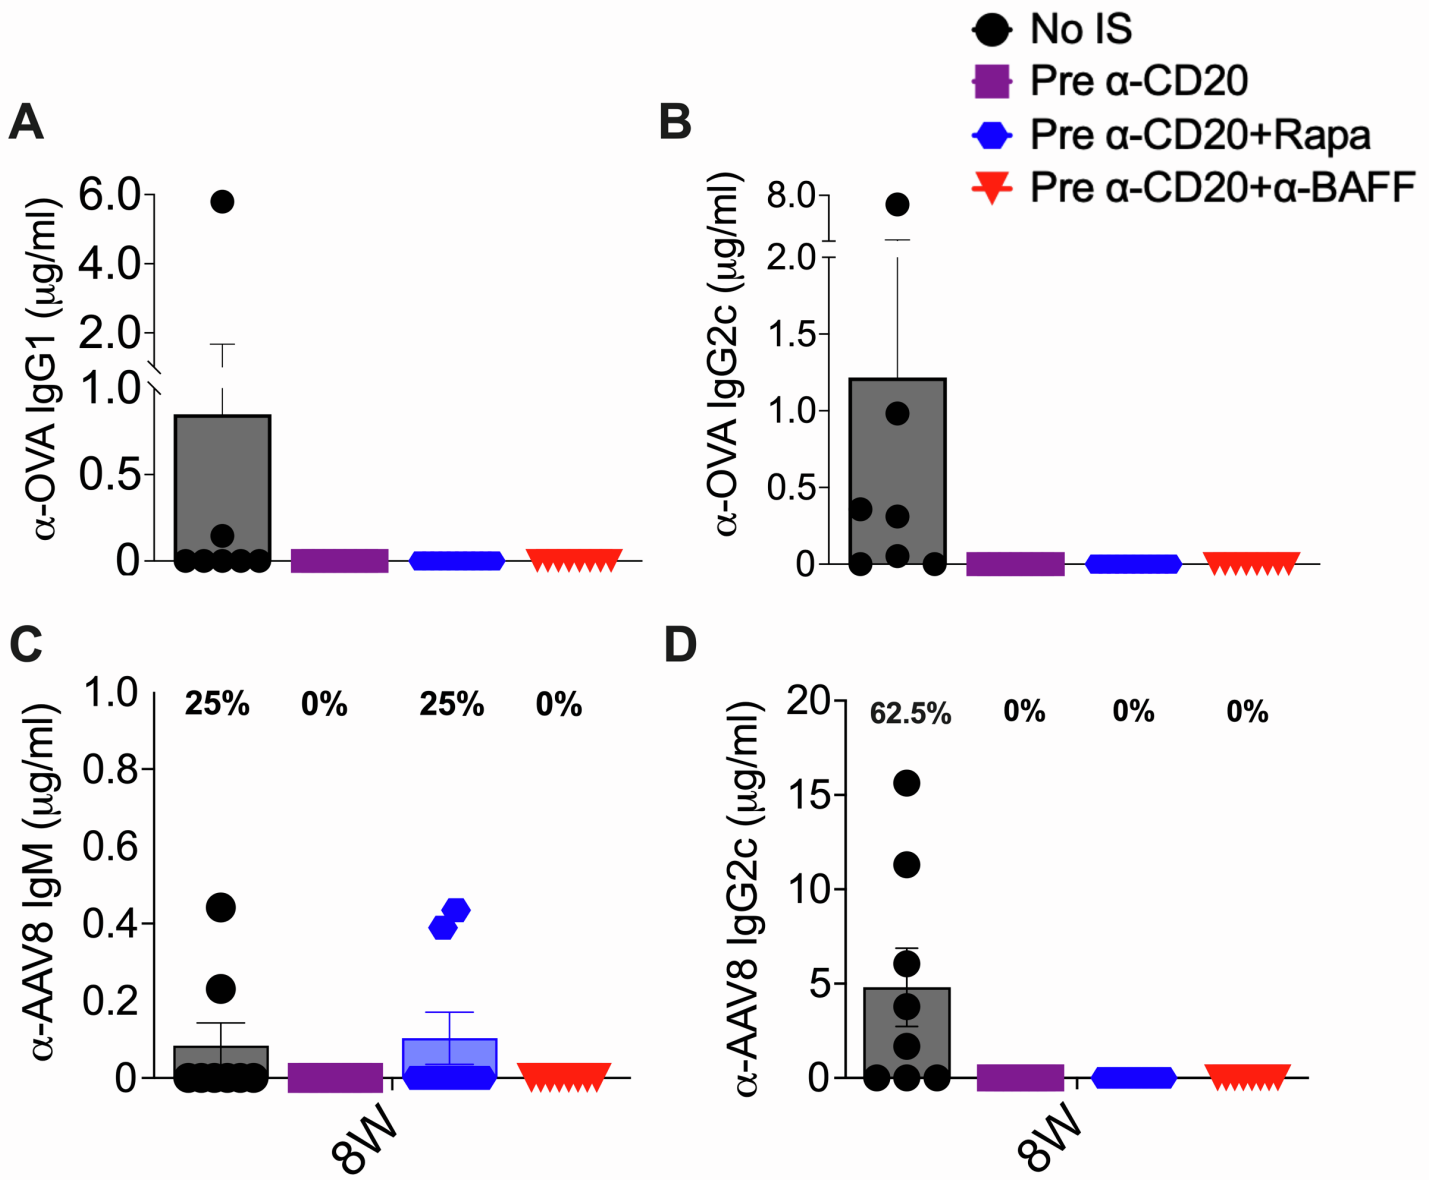

**Figure S2: Effect of IS pre-treatment on primary low dose AAV administration. A and B)** OVA specific IgG1 and IgG2c levels in plasma samples collected at 4 weeks post AAV8-OVA administration and IS pre-treatment (n=7-8/group). **C and D)** Frequencies of animals that develop AAV capsid specific IgM and IgG2c responses from plasma samples collected at 8 weeks post primary low dose AAV8-OVA administration. Statistical significance was calculated by one-way ANOVA (Dunnett's multiple comparisons) for **A**, and **B**.

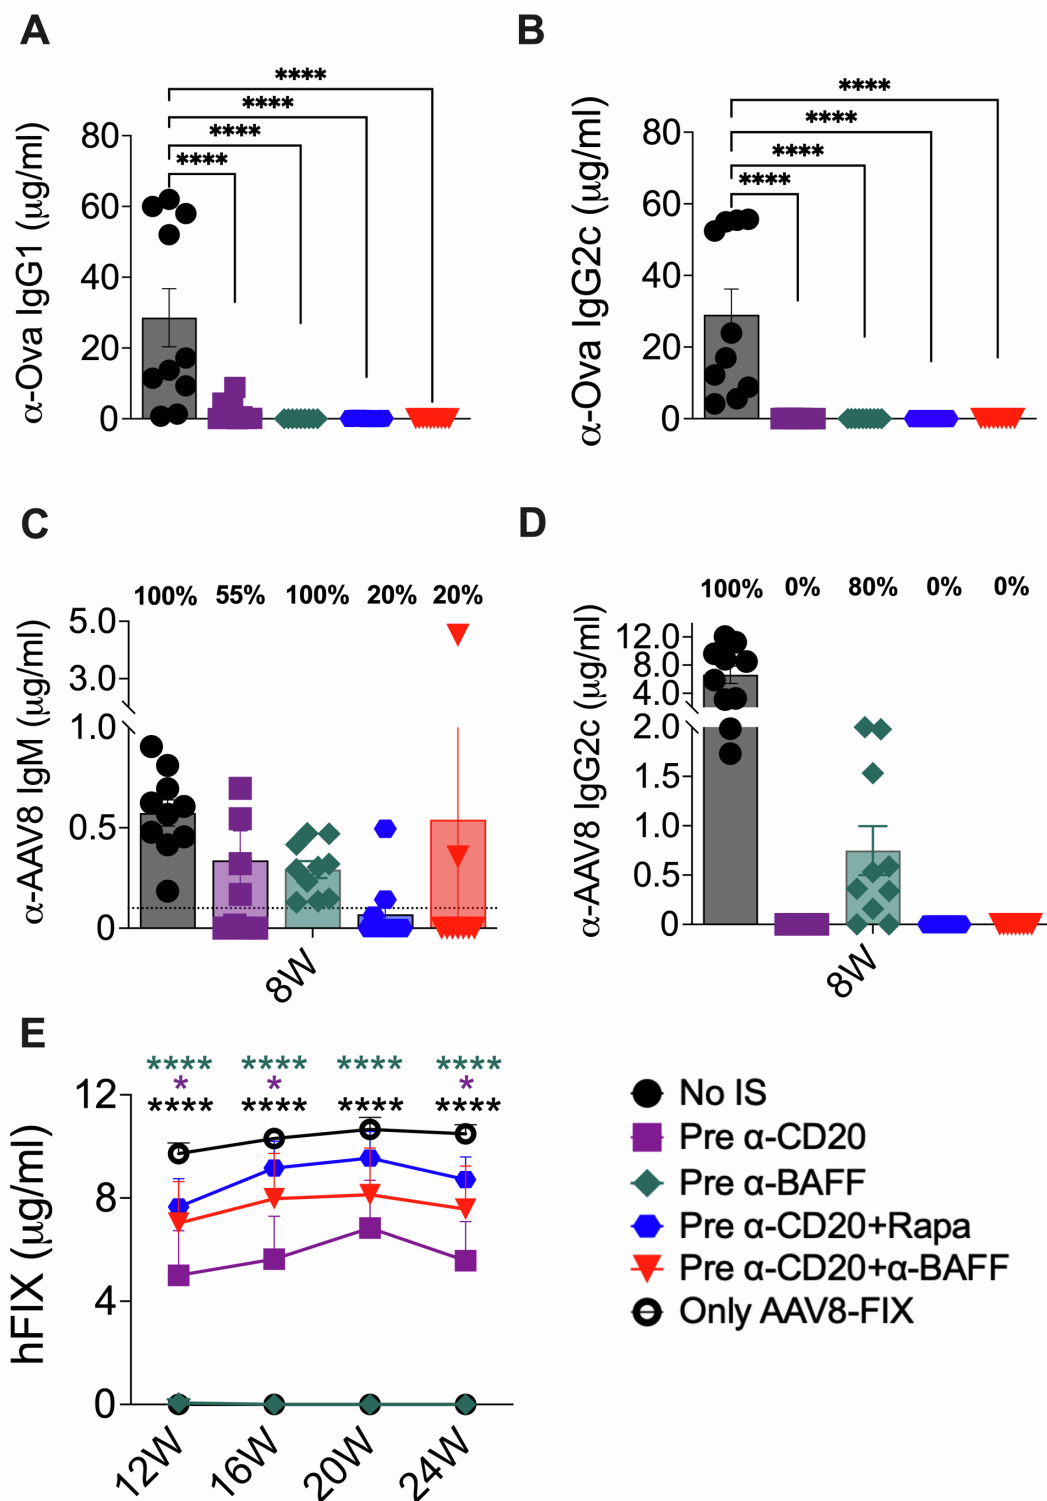

**Figure S3: Effect of IS pre-treatment on primary high dose AAV administration.** **A and B)** OVA specific IgG1 and IgG2c levels in plasma samples collected at 4 weeks post AAV8-OVA administration and IS pre-treatment (n=5-10/group). **C and D)** Frequencies of animals that develop AAV capsid specific IgM and IgG2c responses from plasma samples collected at 8 weeks post primary high dose AAV8-OVA administration. **E)** Circulating hFIX levels at different time points post re-administration with AAV8-hFIX. Statistical significance was calculated by one way ANOVA (Dunnett's multiple comparison) for **A**, and **B**, and two-way ANOVA (vs AAV8-FIX group) for **E**. \* $p \leq 0.05$ ; \*\*\*\* $p \leq 0.0001$ .

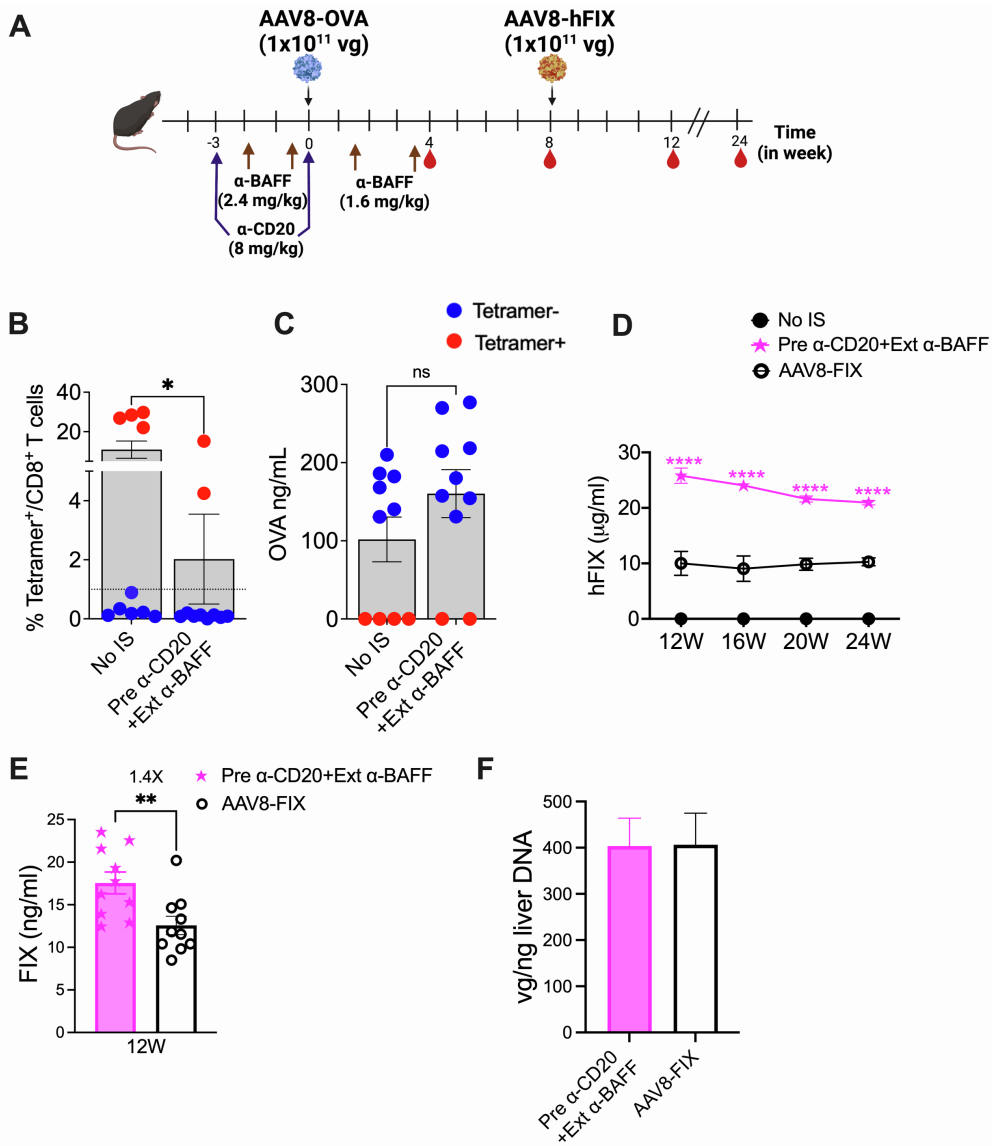

**Figure S4: Effect of extending  $\alpha$ -BAFF treatment on AAV readministration. A) Timeline B) CD8<sup>+</sup> T cell response to OVA transgene in control (no IS) and IS pre-treatment with  $\alpha$ -CD20 + ext  $\alpha$ -BAFF (n=5-10/group). C) Circulating plasma levels of OVA at 4 weeks post AAV8-OVA administration. D) hFIX plasma levels at different time points post readministration. E) Circulating hFIX levels at 4 weeks post AAV8-hFIX re-administration. F) AAV vector genome (vg) copies per ng of DNA in livers of IS treated and naive mice following AAV8-hFIX liver gene delivery. Statistical significance was calculated by one-way ANOVA (Dunnett's multiple comparisons) for B, and C, two-way ANOVA for D, and student's t test for E. \* $p \leq 0.05$ ; \*\*\*\* $p \leq 0.0001$ .**

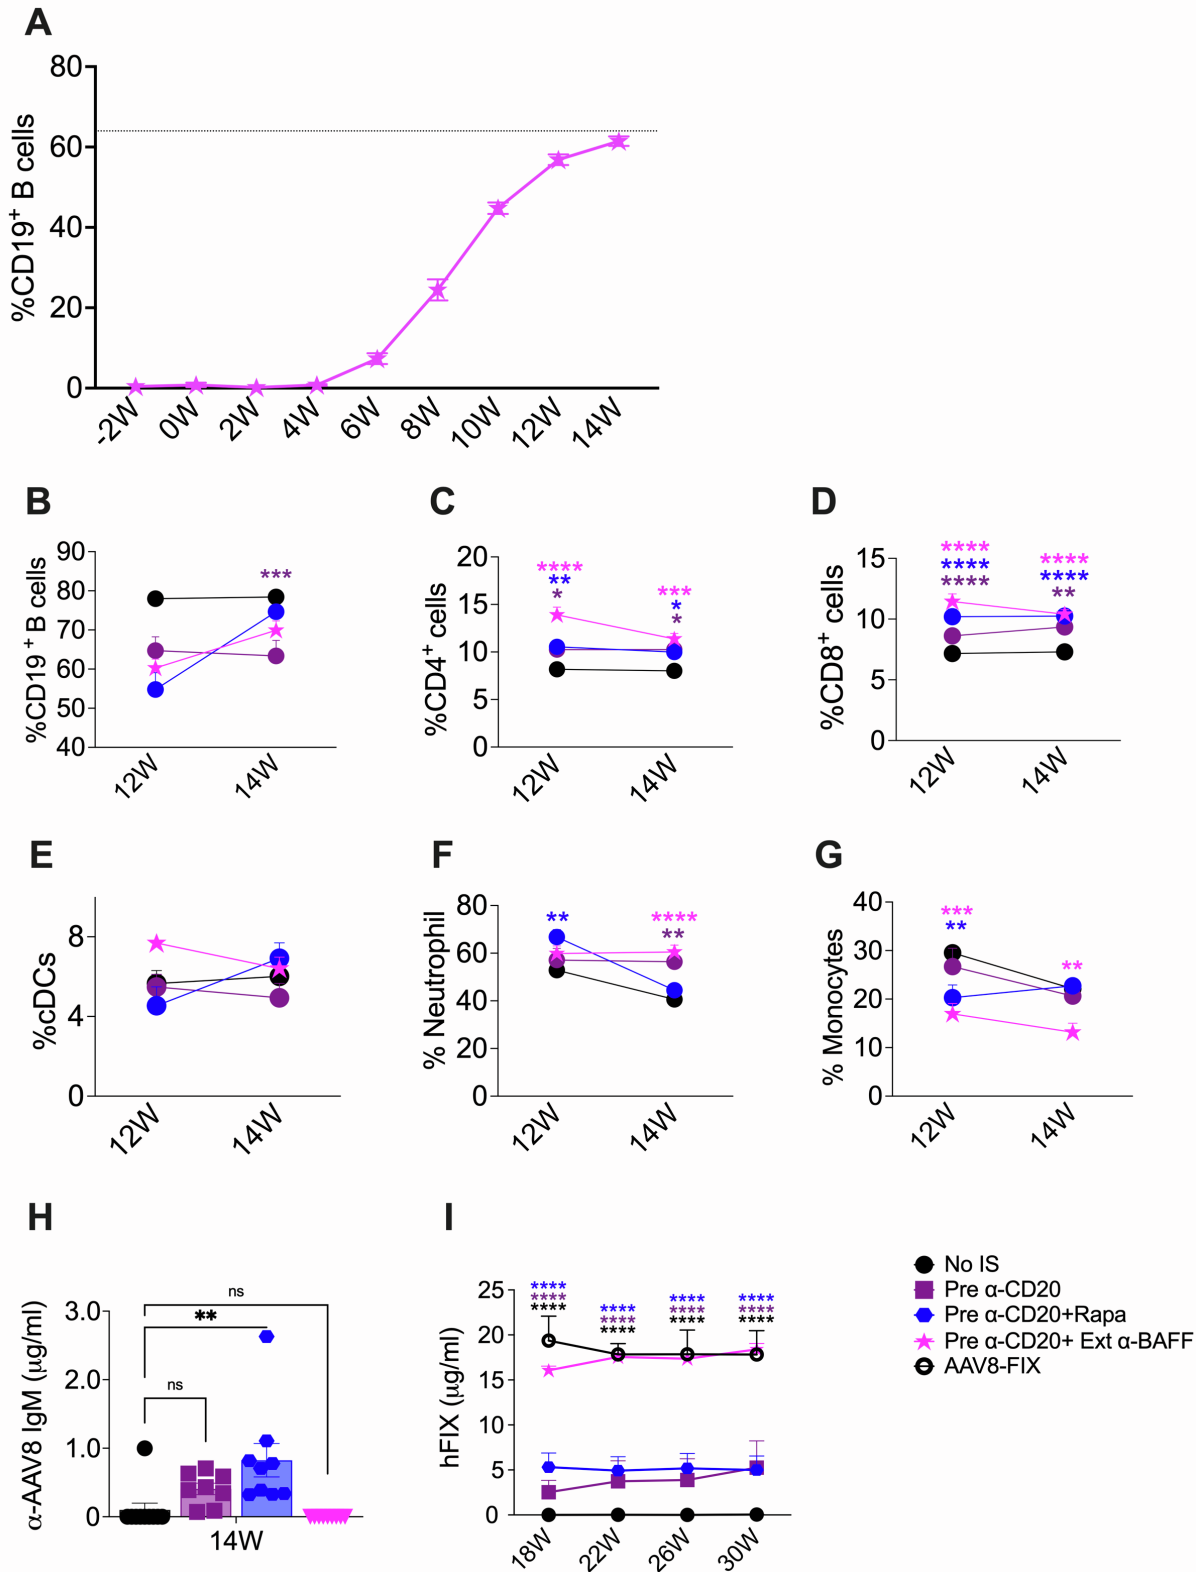

**Figure S5: A)** Kinetics of blood B cell repopulation following  $\alpha$ -CD20 + ext  $\alpha$ -BAFF treatment. Dotted line indicates % of B cells in PBMC from naïve mice. **B-G)** Repopulation of CD19<sup>+</sup> B cells, CD4<sup>+</sup>, CD8<sup>+</sup> T cells, cDCs, neutrophils and monocytes at 12- and 14- weeks post IS pre-treatment (n=5-10/group). **H)** AAV8 capsid specific IgM levels at 14- weeks. **I)** Longitudinal analysis of plasma hFIX expression in control (no IS) and IS pre-treated groups re-dosed at week 15 with AAV8-hFIX. Statistical significance was calculated by one-way ANOVA (Dunnett's multiple comparisons) for **H**, and two-way ANOVA for **B-G** and **I**. \* $p \leq 0.05$ ; \*\* $p \leq 0.01$ ; \*\*\* $p \leq 0.001$ ; \*\*\*\* $p \leq 0.0001$ .

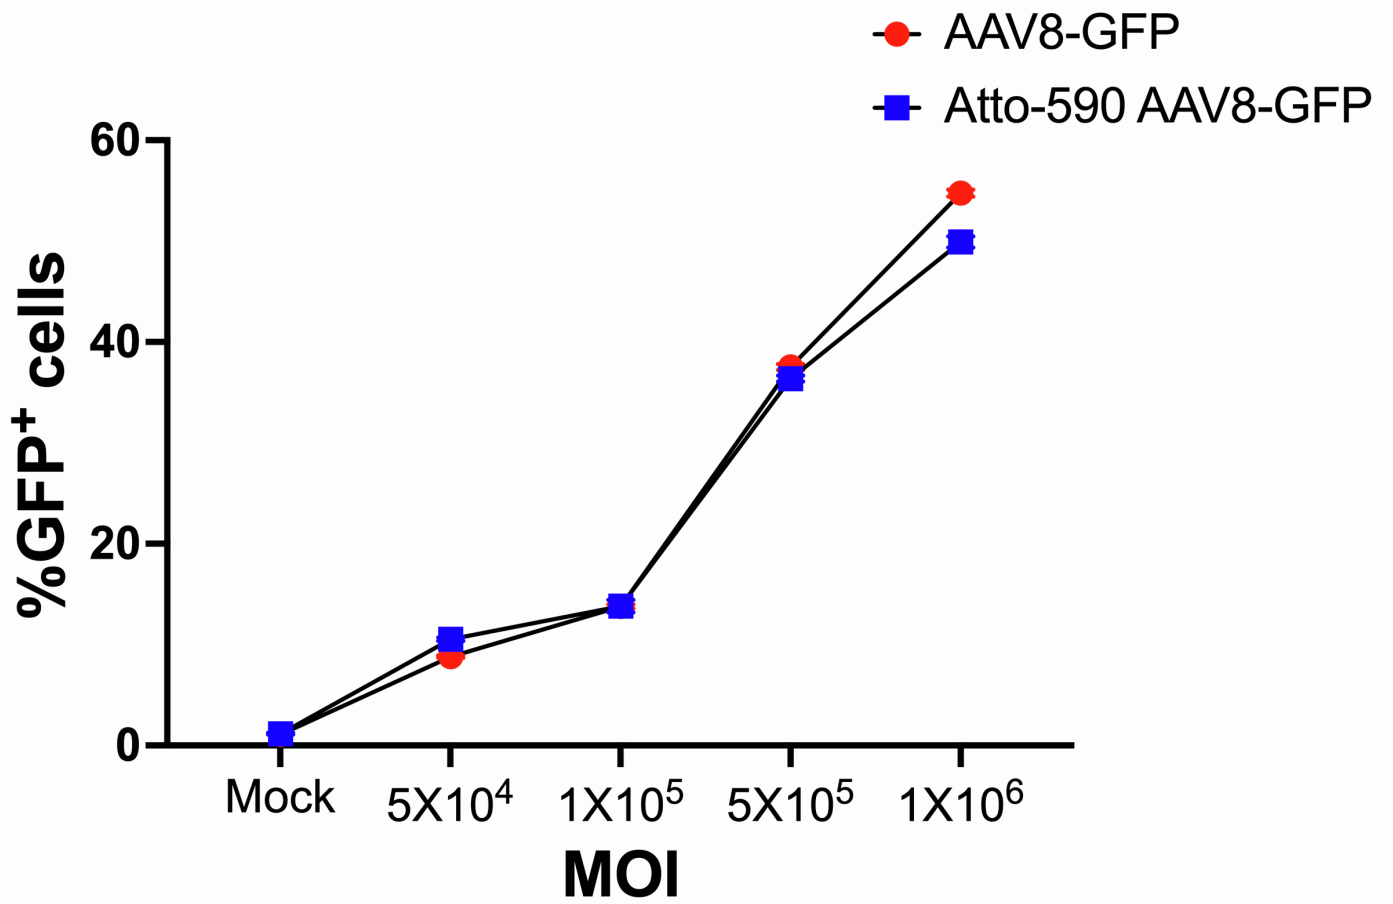

**Figure S6:** In vitro transduction by AAV8-GFP and Atto-590 AAV8-GFP at different MOIs in 2V6.11 cells.

A

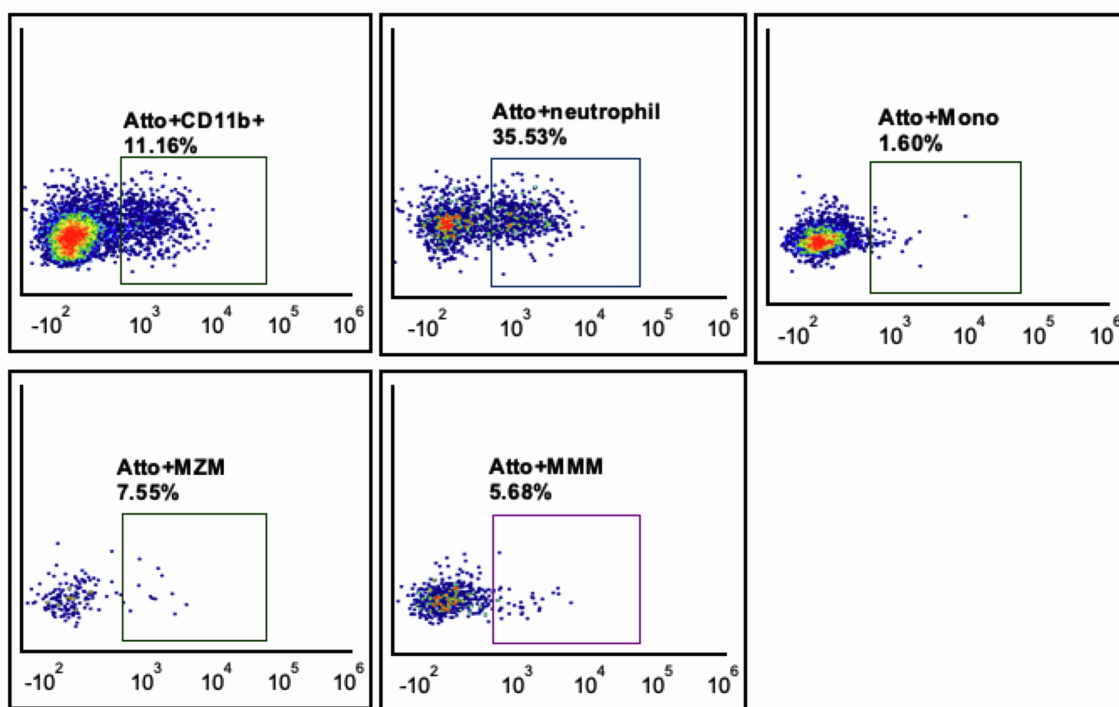

● No IS  
 ■ Pre  $\alpha$ -CD20+ Ext  $\alpha$ -BAFF  
 ○ Naive

B

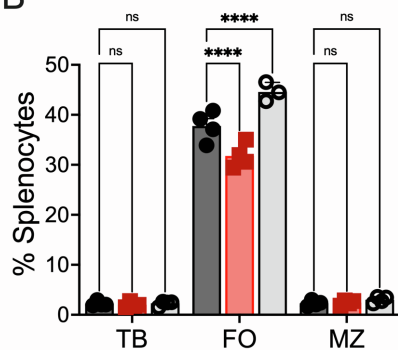

C

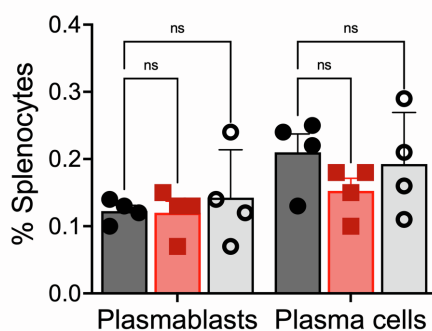

D

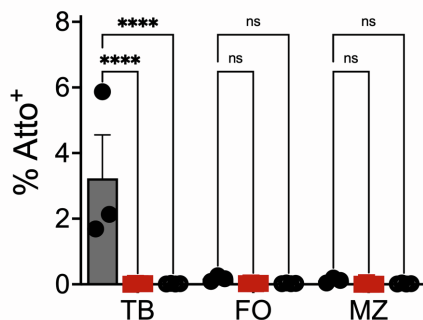

E

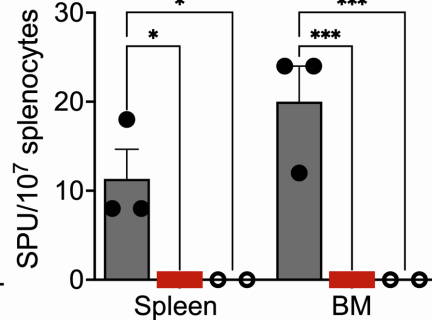

**Figure S7:** **A)** Representative density plots showing uptake of AAV8-Atto-590 in various immune populations (n=2-6/group). **B)** Frequencies of splenic transitional (TB), follicular (FO) and marginal zone (MZ) B cells from AAV8-OVA treated mice that received no IS,  $\alpha$ -CD20+ext  $\alpha$ -BAFF IS pretreatment, naïve animals at 12 weeks. **C)** Frequencies of plasmablasts and plasma cells at 12 weeks. **D)** AAV8-Atto-590 uptake in TB, FO and MZ B cells. **E)** AAV B cell ELISpots from spleen and bone marrow plasma cells of AAV8-OVA treated mice at 12 weeks. Statistical significance was calculated by one-way ANOVA (Dunnett's multiple comparisons) for **B-E**. \*p  $\leq$  0.05; \*\*\*p  $\leq$  0.001; \*\*\*\*p  $\leq$  0.0001.
